# Supplementary material for: Multi-Omics Data Analysis of Gene Expressions and Alterations, Cancer-Associated Fibroblast and Immune Infiltrations, Reveals the Onco-Immune Prognostic Relevance of STAT3/CDK2/4/6 in Human Malignancies
Source: PubMed Central journal article supplement (PMC7956610; doi:10.3390/cancers13050954), 2021-02-25
Supplement: cancers-13-00954-s001.pdf [file cancers-13-00954-s001.pdf]

Article

# Supplemental Materials: Multi-Omics Data Analysis of Gene Expressions and Alterations, Cancer-Associated Fibroblast and Immune Infiltrations, Reveals the Onco-Immune Prognostic Relevance of STAT3/CDK2/4/6 in Human Malignancies

Bashir Lawal, Li-Ching Lin, Jih-Chin Lee, Jia-Hong Chen, Tanios S. Bekaii-Saab, Alexander T.H. Wu and Ching-Liang Ho

Table S1. Proteins directly interacting with CDK2/4/6.

| CDK2                 |                    | CDK4                 |                    | CDK6                 |                    |
|----------------------|--------------------|----------------------|--------------------|----------------------|--------------------|
| Interactive Proteins | Interactive Scores | Interactive Proteins | Interactive Scores | Interactive Proteins | Interactive Scores |
| PLK1                 | 0.603              | PLK1                 | 0.507              | MCM6                 | 0.453              |
| ESPL1                | 0.707              | MCM6                 | 0.543              | PLK1                 | 0.455              |
| CDKN2C               | 0.744              | ORC2                 | 0.551              | ORC2                 | 0.524              |
| MAD2L1               | 0.775              | ESPL1                | 0.598              | MCM4                 | 0.527              |
| CDK4                 | 0.926              | MCM4                 | 0.602              | CDT1                 | 0.556              |
| ORC5                 | 0.936              | MAD2L1               | 0.619              | MAD2L1               | 0.597              |
| ORC3                 | 0.937              | MCM5                 | 0.672              | MCM7                 | 0.598              |
| ORC6                 | 0.954              | MCM7                 | 0.693              | ESPL1                | 0.609              |
| MCM6                 | 0.969              | CDT1                 | 0.746              | MCM5                 | 0.612              |
| CDK6                 | 0.974              | ORC3                 | 0.884              | MCM2                 | 0.928              |
| MCM7                 | 0.979              | MCM2                 | 0.884              | CKS1B                | 0.963              |
| E2F1                 | 0.985              | CKS1B                | 0.972              | E2F1                 | 0.973              |
| MCM5                 | 0.988              | CDK6                 | 0.975              | RB1                  | 0.989              |
| ORC2                 | 0.991              | E2F1                 | 0.977              | CDKN1B               | 0.995              |
| CDT1                 | 0.993              | CDKN1B               | 0.997              | CDKN2C               | 0.999              |
| MCM2                 | 0.994              | CDKN2C               | 0.997              |                      |                    |
| MCM4                 | 0.995              | RB1                  | 0.999              |                      |                    |
| CDKN1B               | 0.999              |                      |                    |                      |                    |
| CKS1B                | 0.999              |                      |                    |                      |                    |
| RB1                  | 0.999              |                      |                    |                      |                    |

Table S2. Proteins directly interacting with STAT3.

| Query Protein | Interactive Proteins | Interactive score |
|---------------|----------------------|-------------------|
| STAT3         | AKT1                 | 0.994             |
| STAT3         | EGFR                 | 0.998             |
| STAT3         | IL10                 | 0.995             |
| STAT3         | IL6                  | 0.997             |
| STAT3         | JAK1                 | 0.997             |
| STAT3         | JAK2                 | 0.998             |
| STAT3         | JAK3                 | 0.994             |
| STAT3         | SOCS3                | 0.995             |
| STAT3         | SRC                  | 0.995             |
| STAT3         | EGF                  | 0.984             |
| STAT3         | GSK3B                | 0.684             |
| STAT3         | KDR                  | 0.789             |
| STAT3         | MTOR                 | 0.989             |
| STAT3         | NOS3                 | 0.695             |
| STAT3         | SRC                  | 0.995             |
| STAT3         | STAT5B               | 0.961             |
| STAT3         | STAT5A               | 0.976             |
| STAT3         | VEGFA                | 0.994             |

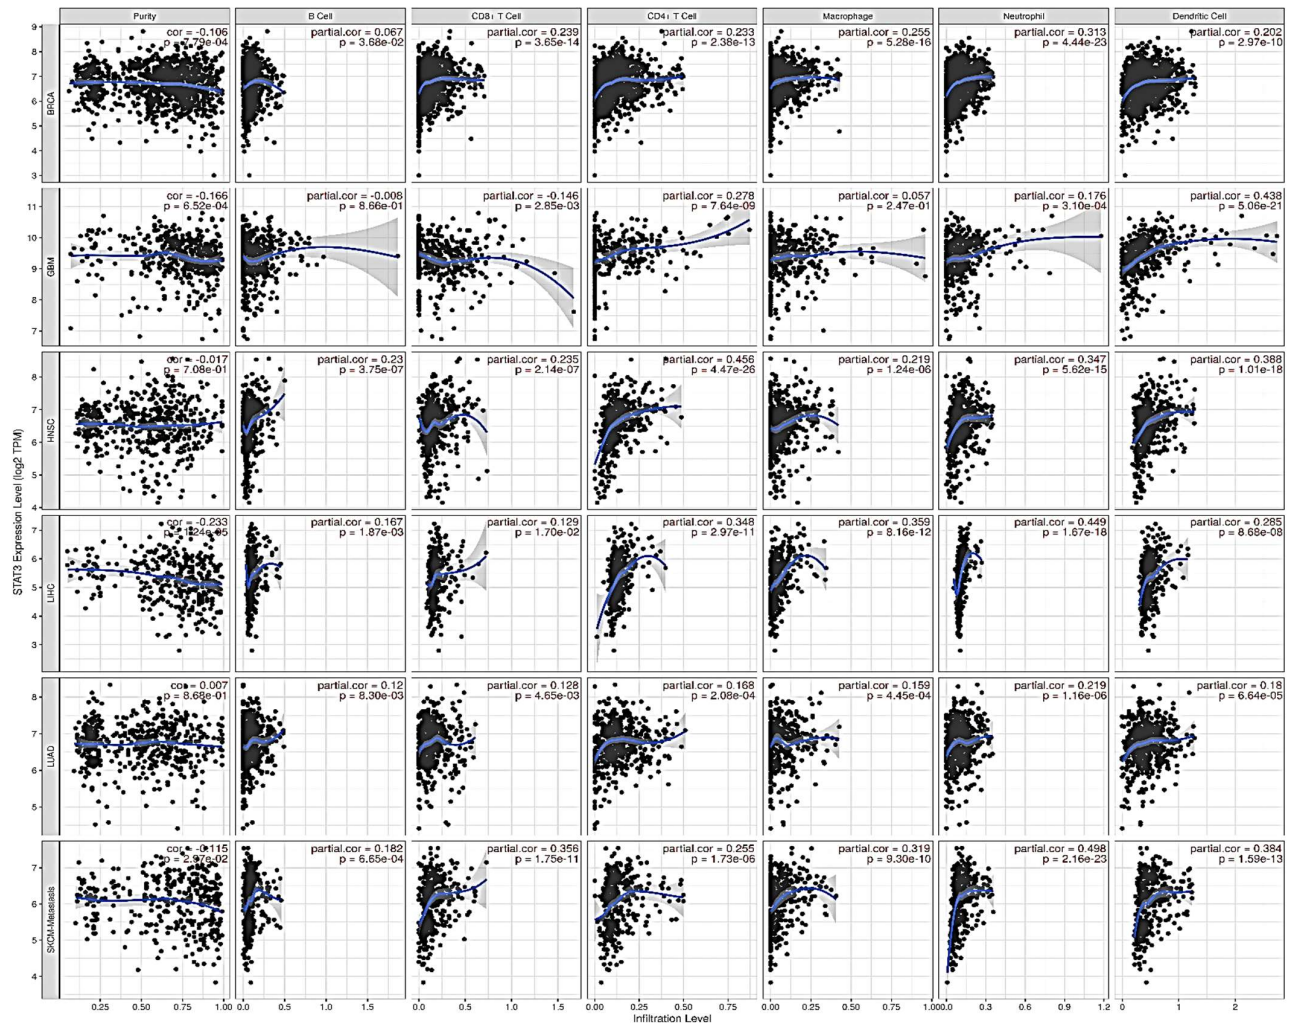

**Figure S1.** Scatterplots showing the correlation of STAT3 expression with immune infiltration level in diverse cancer types. SKCE; Skin cutaneous melanoma, LUAD; Lung adenocarcinoma; LIHC; Liver hepatocellular carcinoma; HNSC; Head and neck cancer, GBM; glioblastoma, BRCA; Breast invasive carcinoma.

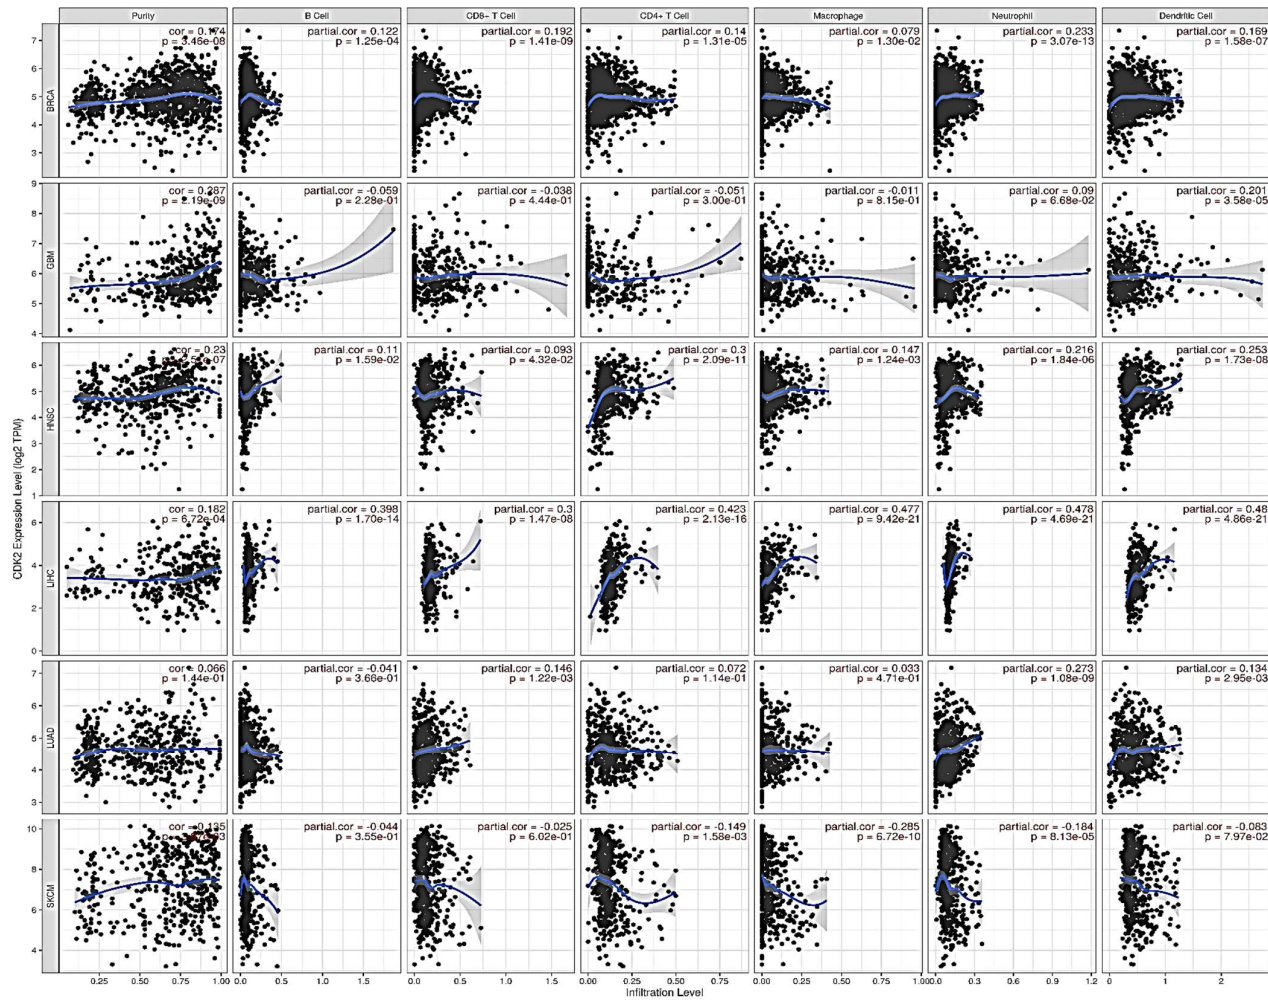

**Figure S2.** Scatterplots showing the correlation of CDK2 expression with immune infiltration level in diverse cancer types. SKCE; Skin cutaneous melanoma, LUAD; Lung adenocarcinoma, LIHC; Liver hepatocellular carcinoma, HNSC; Head and neck cancer, GBM; glioblastoma, BRCA; Breast invasive carcinoma.



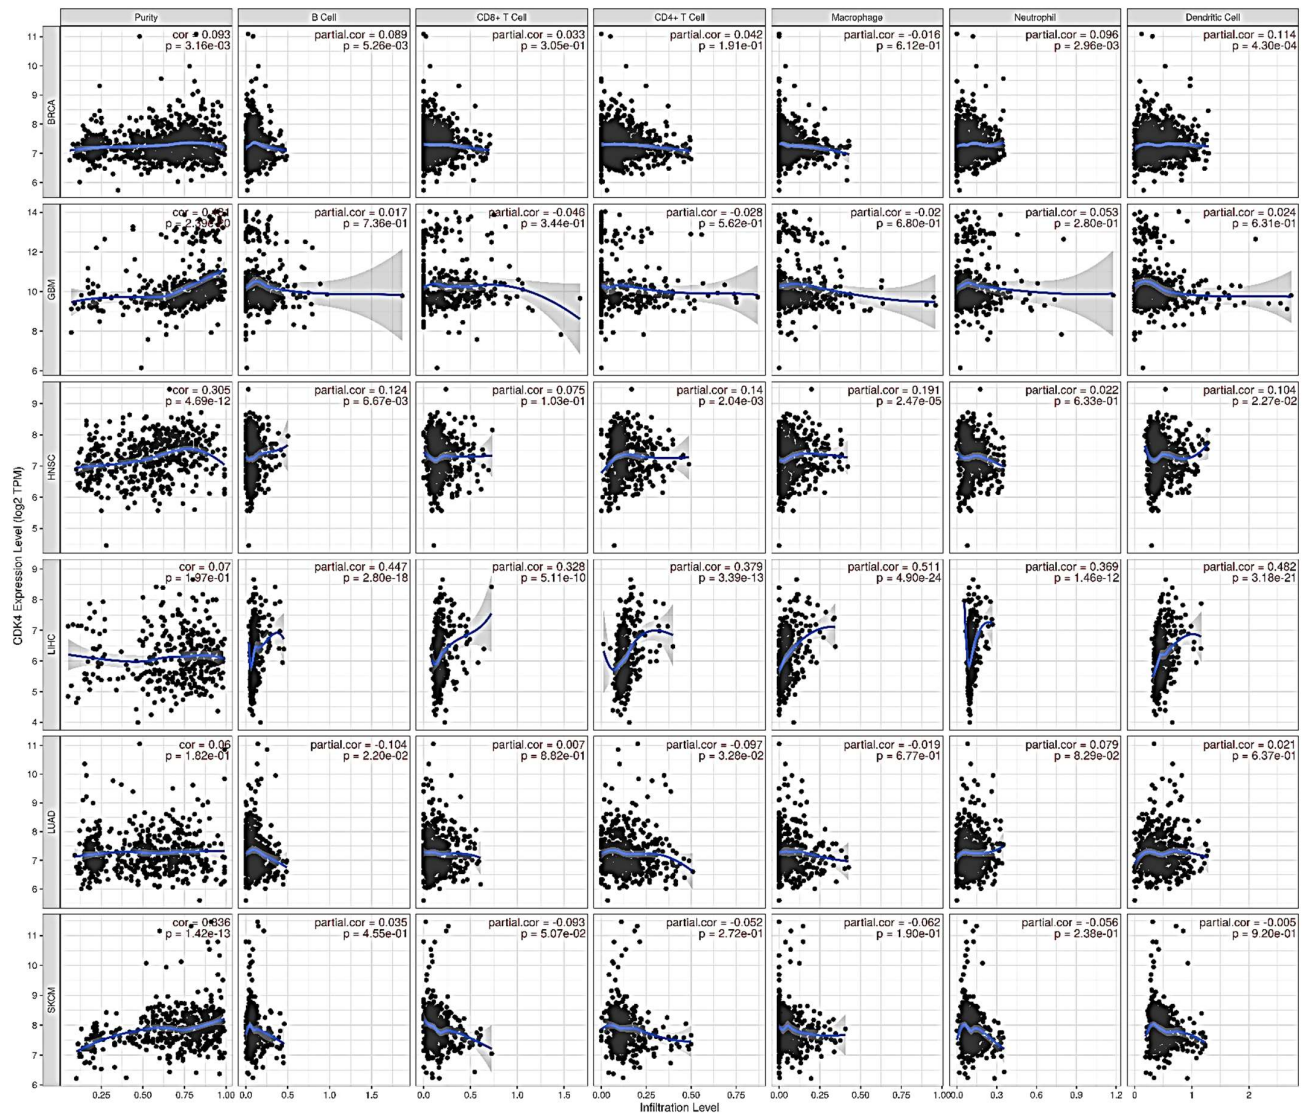

**Figure S3.** Scatterplots showing the correlation of CDK4 expression with immune infiltration level in diverse cancer types. SKCE; Skin cutaneous melanoma, LUAD; Lung adenocarcinoma; LIHC; Liver hepatocellular carcinoma; HNSC; Head and neck cancer, GBM; glioblastoma, BRCA; Breast invasive carcinoma.

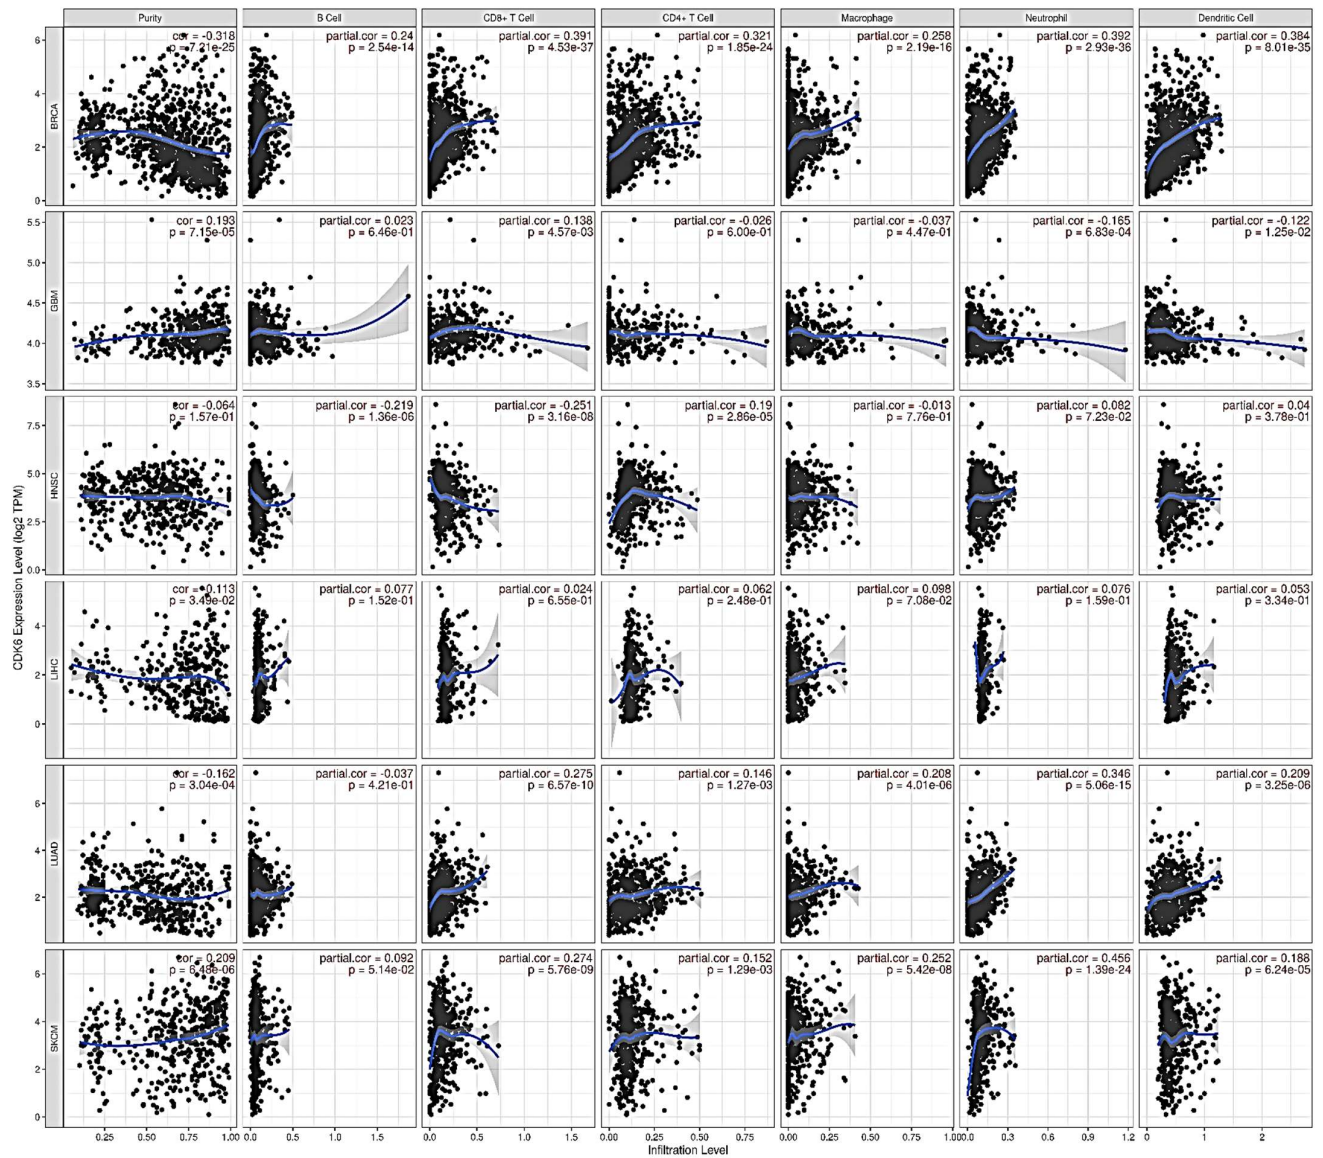

**Figure S4.** Scatterplots showing the correlation of CDK6 expression with immune infiltration level in diverse cancer types. SKCE; Skin cutaneous melanoma, LUAD; Lung adenocarcinoma; LIHC; Liver hepatocellular carcinoma; HNSC; Head and neck cancer, GBM; glioblastoma, BRCA; Breast invasive carcinoma.

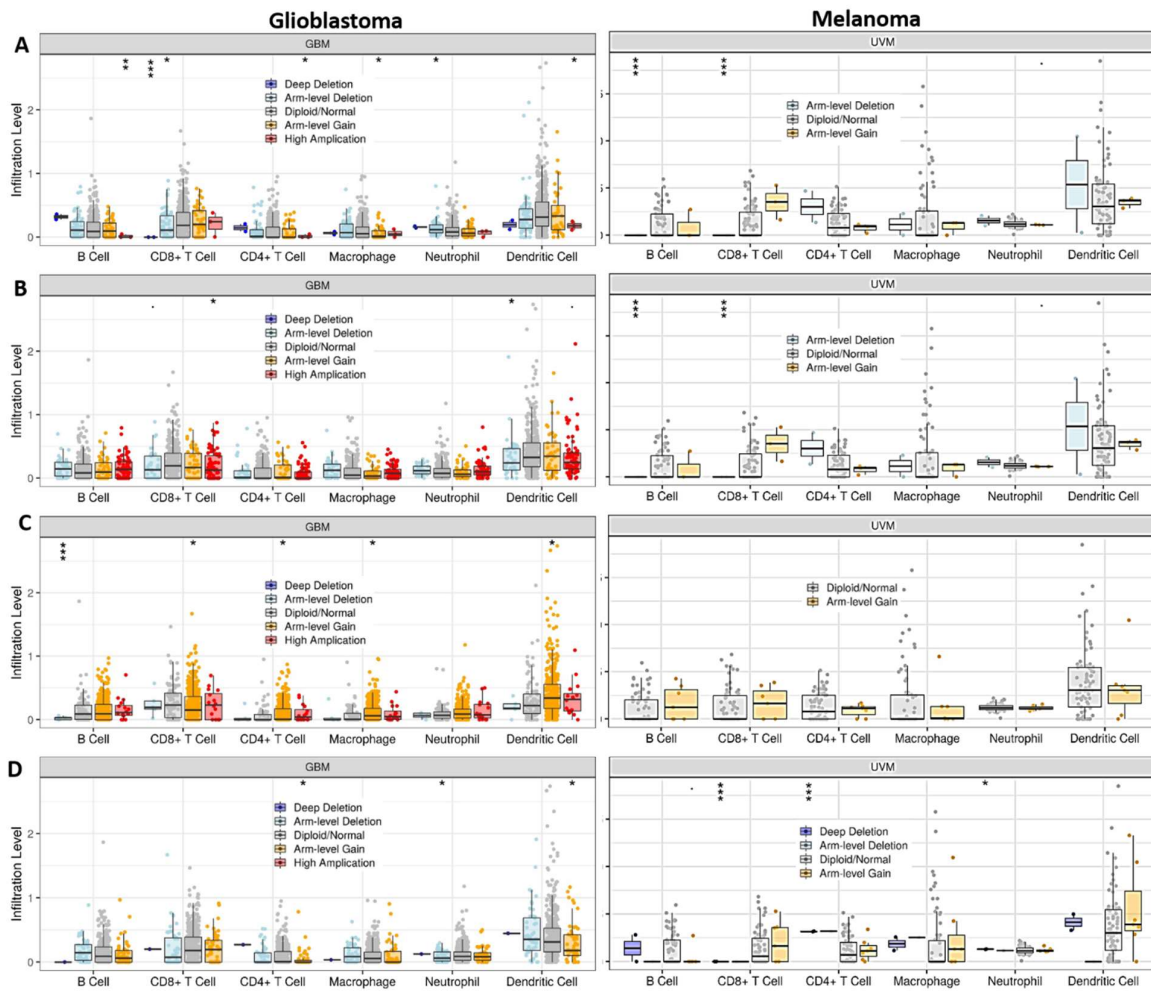

**Figure S5.** Box plots showing tumor immune infiltration levels in GBM patients with different somatic copy number alterations for CDK2/CDK4/CDK6/STAT3. The infiltration abundance in every SCNA category was compared to the diploid/normal. \*  $p < 0.05$ ; \*\*  $p < 0.01$ ; \*\*\*  $p < 0.001$ .

|       | ↕ Cohort | ↕ Cancer    | ↕ Subtype | ↕ CTL Cor | ↕ T Dysfunction | ↕ Risk | ↕ Risk.adj | ↕ Count |
|-------|----------|-------------|-----------|-----------|-----------------|--------|------------|---------|
| CDK2  | TCGA     | Lymphoma    | DLBC      | -0.168    | 0.09            | 2.219  | 2.031      | 41      |
|       | TCGA     | Leukemia    | AML       | 0.025     | 0.816           | 2.141  | 2.205      | 156     |
|       | TCGA     | Breast      | Her2      | -0.073    | 1.001           | 2.005  | 1.988      | 54      |
|       | ↕ Cohort | ↕ Cancer    | ↕ Subtype | ↕ CTL Cor | ↕ T Dysfunction | ↕ Risk | ↕ Risk.adj | ↕ Count |
| CDK4  | TCGA     | Brain       | Glioma    | 0.11      | -1.171          | 6.346  | 5.956      | 510     |
|       | TCGA     | Lymphoma    | DLBC      | -0.168    | 0.097           | 2.223  | 2.035      | 41      |
|       | TCGA     | Breast      | Her2      | 0.09      | 0.87            | 2.13   | 2.133      | 54      |
|       | ↕ Cohort | ↕ Cancer    | ↕ Subtype | ↕ CTL Cor | ↕ T Dysfunction | ↕ Risk | ↕ Risk.adj | ↕ Count |
| CDK6  | TCGA     | Breast      | LumB      | -0.102    | 2.374           | -2.771 | -2.926     | 120     |
|       | TCGA     | Brain       | Glioma    | 0.083     | -0.601          | 2.562  | 2.054      | 510     |
|       | ↕ Cohort | ↕ Cancer    | ↕ Subtype | ↕ CTL Cor | ↕ T Dysfunction | ↕ Risk | ↕ Risk.adj | ↕ Count |
| STAT3 | TCGA     | Stomach     |           | -0.063    | -0.272          | 2.776  | 2.78       | 376     |
|       | TCGA     | Lymphoma    | DLBC      | -0.285    | -2.317          | 2.082  | 1.822      | 41      |
|       | TCGA     | Endometrial |           | 0.067     | -0.426          | -2.485 | -2.45      | 533     |
|       | TCGA     | Brain       | Glioma    | -0.05     | 4.402           | -2.254 | -1.913     | 510     |

**Figure S6.** Graphical data representation of association between CNA of STAT3/CDK2/4/6 and dysfunctional T-cell phenotypes and prognostic relevance in multiple cancers.
